# Supplementary material
Source: publisher figshare collection journal article supplement (https://acs.figshare.com/ndownloader/files/9918418)
Supplement: Supplementary file 1 [file 9918418]

# Doping of Self-Catalyzed Nanowires under the Influence of Droplets

Yunyan Zhang,<sup>†</sup> Zhiyuan Sun,<sup>‡,⊥</sup> Ana M. Sanchez,<sup>#,⊥</sup> Manfred Ramsteiner,<sup>§,⊥</sup> Martin Aagesen,<sup>||</sup> Jiang Wu,<sup>†</sup>

Dongyoung Kim,<sup>†</sup> Pamela Jurczak,<sup>†</sup> Suguo Huo,<sup>¶</sup> Lincoln J. Lauhon,<sup>‡</sup> and Huiyun Liu<sup>†</sup>

<sup>†</sup> Department of Electronic and Electrical Engineering, University College London, London WC1E 7JE, United Kingdom;

<sup>‡</sup> Department of Materials Science and Engineering, Northwestern University, 2220 Campus Drive, Evanston, Illinois 60208-3108, United States

<sup>#</sup> Department of Physics, University of Warwick, Coventry CV4 7AL, United Kingdom

<sup>§</sup> Paul-Drude-Institut für Festkörperelektronik, Hausvogteiplatz 5–7, 10117 Berlin, Germany

<sup>||</sup> Center for Quantum Devices, Niels Bohr Institute, University of Copenhagen, Universitetsparken 5, 2100 Copenhagen, Denmark

<sup>¶</sup> London Centre for Nanotechnology, University College London, London WC1H 0AH, United Kingdom

## Supporting information 1:

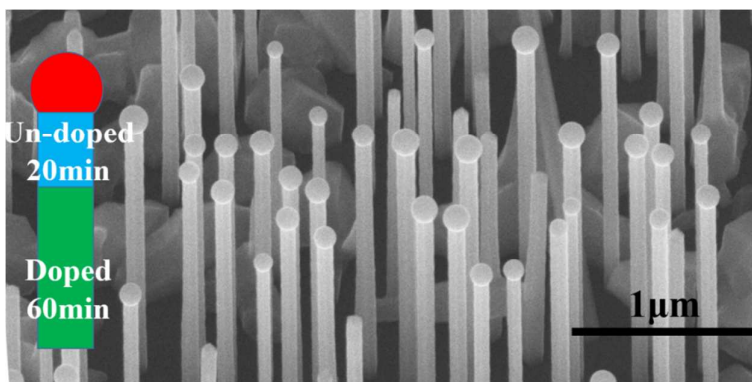

**Figure S1.** SEM image of GaAs NWs grown with a 60 mins Be doped duration (nominal concentration  $1.6 \times 10^{18}/\text{cm}^3$ ) and then followed by a 20 mins non-doped duration. The Ga droplet is on the exact top of the NW.

Supporting information 2:

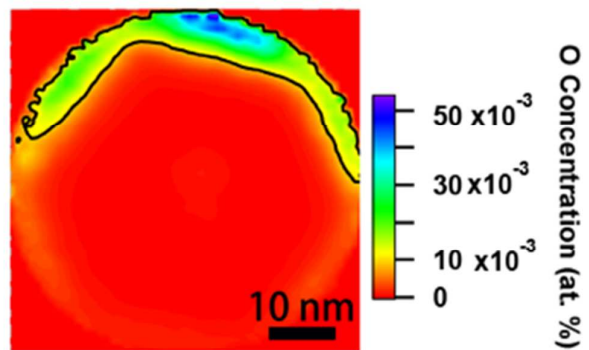

**Figure S2.** Oxygen distribution map in the NW cross-section shown in Figure 3a.
